# Supplementary material for: Identification of Toxic Pyrrolizidine Alkaloids and Their Common Hepatotoxicity Mechanism
Source: Int J Mol Sci. 2016 Mar 7;17(3):318. doi: 10.3390/ijms17030318 (PMC4813181; doi:10.3390/ijms17030318)
Supplement: Supplementary file 1 [file ijms-17-00318-s001.xlsx]

## Sheet: Table S1
Table S1. Dataset of PAs
Dataset	Type	name
		Adonitoline
		Fulvine
		Intermedine
		Isoline
		Jacobine
		Jacoline
	Retronecine	Monocrotaline
	13	Retrorsine
		Riddelliine
Toxic PAs		Senecionine
22		Seneciphylline
		Symphytine
		Senecicannabine
		Asperumine
	Heliotridine	Heliotrine
	5	Lasiocarpine
		Supinine
		Trachelanthate
		Clivorine
	Otonecine	Hydroxysenkirkine
	4	Petasitenine
		Senkirkine
		9-Angeloylhasta necine
	open loop PA	sarracine
	5	chloridate-[N-chloromethene-hectorine]
		chloridate-[N-chloromethene-sarracine]
		chloridate-[N-chloromethene-9-Angeloylhastanecine]
Non-Toxic compounds		Caffeic acid
13	Organic acid	1-caffeoylquinic acid methyl ester
	3	Methyl 2,5-dihydroxy benzaneacetate
		Quercetin
	Flavonoids	Chrysin
	5	Isoquercitrin
		Mangiferin
		Linaric acid

## Sheet: Table S2
Table S2. 34 enzymes(containing 3D structure) in GSH metabolism
Protein	PDB ID
GSTP1	2A2R 3GUS 3CSH 3DGQ 2A2S 3IE3 3HKR 1AQW 1PGT 1LBK 3CSI 3CSJ 22GS 19GS 17GS 18GS 16GS 13GS 8GSS 6GSS 2PGT 2GSS 3GSS 1AQV 3HJO 5GSS 9GSS 1KBN
LAP3	2A2R 3GUS3CSH 3DGQ 2A2S 3IE3 3HKR 1AQW 1PGT 1LBK 3CSI 3CSJ 22GS 19GS 17GS 18GS 16GS 13GS 8GSS 6GSS 2PGT 2GSS 3GSS 1AQV 3HJO 5GSS 9GSS
GR	1A1G 1BWC 1DNC 1GRA 1GRB 1GRE 1GRF 1GRG 1GRH 1GRT 1GSN 1K4Q 1XAN 1AAQ 2GH5 1GRT 3DJG 3DJJ 3DK4 3DK8 1DK9 3GRS 3GRT 4GR1 4GRT 5GRT 3DK9
GSTA1	1K3Y 1K3L 1PL1 2R3X 1PL2 1K3O 1XWG 1YDK 3I6A 1PKW 1GSE 1USB 1PKZ 3I69 1GSD 2R6K 1GUH 1GSF 1LBK
GSTM2	2C4J 1XW5 1HNA 1YKC 3GUR 2AB6 2GTU 3GTU 1HNC 1HNB
GSTM1	1XW6 1XWK 1YJ6 1GTU 2F3M
GGCT	3CRY 2Q53 2I5T 2RBH 2PN7
SRM	2O07 2O0L 2O05 2O06
G6PD	2BHL 2BH9 1QKI 2PGD
ODC1	2OO0 1D7K 2ON3
GSTT2	1LJR 2LJR 3LJR
GSTT1	2C3Q 2C3T 2C3N
GPX4	2OBI 2GS3
SMS	3C6K 3C6M
GSTA2	2VCT 2WJU
GSTA3	2VCV 1TDI
GSTA4	1GUL 1GUM
RRM2B	3HF1 2VUX
IDH1	1T0L 1T09
TXNDC12	1SEN 2K8V
GSTM4	4GTU
GSS	2HGS
GSTO1	1EEM
GSTK1	1YZX
IDH2	4JA8
PGD	2JKV
GPX7	2P31
GPX2	2HE3
GPX3	2R37
GPX1	2F8A
GPX5	2I3Y
RRM1	2WGH
RRM2	2UW2
GSTZ1	1FW1

## Sheet: Table S3
Table S3. Prediction models 1-3								model 3
Coefficients a								prototype, DHR&DHP separated 34		non-compounds 13
		Unstandized Coefficients		Standardized Coefficients
Model	Parameter	B	Std. Error	Beta	t	Sig.
1	(Constant)	.791	.060		13.182	.000
	GR	-.791	.186	-.531	-4.255	.000		Parameter pattern	Toxic prediction precision	Non-Toixic prediction precision	Total Precision
2	(Constant)	.533	.091		5.860	.000		IDH1	4/34	14/13	0.383
	GR	-.929	.171	-.624	-5.426	.000		IDH2	26/34	7/13	0.7021
	IDH2	.395	.113	.403	3.505	.001		IDH1 IDH2	0/34	7/13	0.1489
3	(Constant)	.364	.095		3.813	.000		GR	34/34	5/13	0.8298
	GR	-.929	.154	-.624	-6.046	.000		ALL	0/34	0/13	0
	IDH2	.565	.113	.576	5.019	.000
	IDH1	.636	.185	.387	3.446	.001
a Dependent Variable: TOXIC
